# Supplementary material
Source: PubMed Central journal article supplement (PMC10912996)
Supplement: jama-e242671-s001.pdf [file jama-e242671-s001.pdf]

1 **eSupplement**

2

3 **Statistical analysis plan**

4

5 **Surgery versus Functional Bracing for Closed Displaced Humeral Shaft Fractures – A 5-year Follow-Up of**  
6 **the FISH Randomized Clinical Trial**

7

8 Lasse Rämö, Thomas Ibounig, Bakir O. Sumrein, Vesa Lepola, Mika Paavola, Simo Taimela, Teppo L.N.  
9 Järvinen, on behalf of Finnish Shaft of the Humerus (FISH) Investigators

10

11

12 **This supplement contains the following items:**

|    |      |                                            |    |
|----|------|--------------------------------------------|----|
| 13 | 1.   | TRIAL REGISTRATION                         | 2  |
| 14 | 1.1. | Original registration                      | 2  |
| 15 | 1.2. | Final registration – Amended Sections Only | 4  |
| 16 | 1.3. | Summary of Amendments                      | 4  |
| 17 | 2.   | PROTOCOL                                   | 5  |
| 18 | 3.   | STATISTICAL ANALYSIS PLAN – 1-YEAR RESULTS | 6  |
| 19 | 3.1. | Original Statistical Plan                  | 6  |
| 20 | 3.2. | Blinded Data Interpretation Protocol       | 6  |
| 21 | 3.3. | Statistical Analysis Plan – Amendments     | 7  |
| 22 | 4.   | STATISTICAL ANALYSIS PLAN – 2-YEAR RESULTS | 8  |
| 23 | 4.1. | Background                                 | 8  |
| 24 | 4.2. | Statistical methods                        | 8  |
| 25 | 4.3. | Implementation of Analysis Plan            | 8  |
| 26 | 5.   | STATISTICAL ANALYSIS PLAN – 5-YEAR RESULTS | 10 |
| 27 | 5.1. | Background                                 | 10 |
| 28 | 5.2. | Statistical methods                        | 10 |
| 29 | 5.3. | Implementation of Analysis Plan            | 10 |

30

31

32 **1. TRIAL REGISTRATION**

33

34 **1.1. Original registration**

35

36 Original trial registration submitted to Clinical Trials.gov on October 30, 2012 can be accessed at:

37 [https://clinicaltrials.gov/ct2/history/NCT01719887?V\\_1=View#StudyPageTop](https://clinicaltrials.gov/ct2/history/NCT01719887?V_1=View#StudyPageTop)

38

39 This registration with relevant information is copied below:

40 Study Start: October 2012 (first patient recruited November 4, 2012)

41 First Submitted: October 28, 2012 (at clinicaltrials.gov)

42

43 **Brief Summary**

44

45 Humeral shaft fractures represent 1-3% of all fractures and 20% of the humeral fractures. These fractures have  
46 historically been treated mainly conservatively with good results. Recent development in fracture treatment and  
47 findings that certain fracture types are more prone to non-union and bracing-related functional problems of adjacent  
48 joints are somewhat common have caused increasing interest in treating these fractures surgically. Return to activities  
49 is also considered to be quicker among surgically treated patients.

50

51 The purpose of this study is to evaluate effectiveness and cost-effectiveness of surgical treatment of humeral shaft  
52 fractures. Patients with a unilateral humeral shaft fracture who are willing to participate in the study after informed  
53 consent are randomly assigned to two different treatment methods:

54

55 Surgical treatment with an open reduction and internal fixation with a 4,5mm locking plate.

56 Conservative treatment with functional bracing

57

58 The randomization is done using blocked randomization (block sizes are not known by the enrolling or assigning  
59 physician) and stratification is done according to fracture type (AO-OTA type A vs. type B/C) and radial nerve status  
60 (total/subtotal motor palsy vs. no palsy).

61

62 Standard follow-up visits at 6 weeks, 3, 6 and 12 months are arranged. Later follow-up visits are arranged at 2, 5 and  
63 10 years for the study purpose. Patients fill evaluation forms and clinical and radiological assessments are made. The  
64 physiotherapist doing objective functional measurements is blinded to treatment method. Both study groups receive  
65 physiotherapy after the initial treatment.

66

67 **Study Design**

68 **Study Type:** Interventional

69 **Interventional Study Model:** Parallel Assignment

70 **Number of Arms:** 2

71 **Masking:** Single Outcomes Assessor

72 **Allocation:** Randomized

73 **Enrollment:** 100 [Anticipated]

74

75 **Arms and Interventions**

76 **Active Comparator:** Conservative treatment

77 Conservative treatment with functional brace and physiotherapy.

78 Device: Conservative treatment

79 Conservative treatment with functional brace applied after 7 days of initial treatment with prefabricated cork splint.

80 Physiotherapy

81 Physiotherapy is arranged to both groups at 3 and 9 wks.

82 **Experimental:** Operative treatment  
83 Operative treatment with open reduction and internal fixation with 4,5mm locking compression plate. Physiotherapy  
84 at 3 and 9 wks.  
85 Procedure: Operative treatment  
86 Operative treatment with open reduction and internal fixation using 4,5mm locking compression plate.  
87 Physiotherapy  
88 Physiotherapy is arranged to both groups at 3 and 9 wks.  
89

## 90 **Outcome Measures**

91  
92 Primary Outcome Measures:

- 93 1. Pain at rest and in activity, Change in Numerical Rating Scale (NRS) 0-10  
94 at 6 wks, 3, 6, 12 mo, 2, 5, 10 years
- 95 2. Change in The Disabilities of the Arm, Shoulder and Hand Score (DASH)  
96 at 6 wks, 3, 6, 12 mo, 2, 5, 10 years

97  
98 Secondary Outcome Measures:

- 99 3. Subjective assessment of the function of the upper extremity  
100 Numerical Rating Scale (NRS) 0-10 Subjective assessment of the function of the upper extremity
- 101 4. Constant Score
- 102 5. Elbow ROM
- 103 6. Health-related quality of life (15D)
- 104 7. Complications  
105 Incidence of re-fracture, reoperation, infection and iatrogenic radial palsy is recorded and compared  
106 between study groups.
- 107 8. Union  
108 Time to union, non-union, malunion Union
- 109 9. Cost-effectiveness  
110 Quality-adjusted life years/months measured as a change in 15D tool, pain-NRS and other outcome  
111 measures. Cost-effectiveness
- 112 10. Subjective assessment of the function of the upper extremity  
113 Likert Scale 1-7 Subjective assessment of the function of the upper extremity
- 114 11. Subjective assessment of the function of the elbow  
115 Numerical Rating Scale (NRS) 0-10 Subjective assessment of the function of the elbow

## 116 117 **Eligibility**

118

### 119 **Inclusion Criteria:**

- 120 • Over 18 years old patient who agrees to the consent to participation in this study
- 121 • Unilateral dislocated humeral shaft fracture (dislocation over thickness of the bone cortex, fracture below the  
122 level of insertion of pectoralis major muscle and 5 cm above the olecranon fossa)
- 123 • Randomization can be done within 10 days and operation within 14 days after the initial trauma
- 124 • Patient is willing to participate all follow-up visits

125

### 126 **Exclusion Criteria:**

- 127 • Bilateral humeral shaft fracture
- 128 • A significant concomitant trauma of the same upper extremity that warrants operative treatment (fracture,  
129 tendon injury, soft tissue trauma)
- 130 • Other fracture or abdominal/thoracic trauma that warrants operative treatment

- 131 • Open fracture
- 132 • Pathological fracture
- 133 • Multi-trauma patient
- 134 • Vascular injury
- 135 • Plexus injury
- 136 • Previous trauma in the same upper extremity that causes functional deficit
- 137 • Trauma or condition that warrants use of walking aid (crutches, wheelchair etc.)
- 138 • Disease that affects significantly general condition of the patient
- 139 • Significantly impaired ability to co-operate for any reason (substance abuse, mental disorder, dementia)
- 140 • Unwilling to accept both treatment methods

## 142 1.2. Final registration – Amended Sections Only

144 The final protocol submitted to Clinical Trials.gov can be accessed at:  
145 <https://clinicaltrials.gov/ct2/show/NCT01719887>

147 **Enrollment:** 100 [Anticipated] 82 [Actual]

### 149 Outcome Measures

151 Primary Outcome Measures:

- 152 1. ~~Pain at rest and in activity, Change in Numerical Rating Scale (NRS) 0-10~~  
153 ~~at 6 wks, 3, 6, 12 mo, 2, 5, 10 years~~
- 154 2. ~~Change in The Disabilities of the Arm, Shoulder and Hand Score (DASH)~~  
155 ~~at 6 wks, 3, 6, 12 mo, 2, 5, 10 years months~~
- 156 1. The Disabilities of the Arm, Shoulder and Hand Score (DASH) at 12 months

158 Secondary Outcome Measures:

- 159 7. Complications  
160 Incidence of complications (i.e. non-union, malunion, re-fracture, reoperation, infection and  
161 iatrogenic radial palsy) is recorded and compared between study groups.
- 162 11. The Disabilities of the Arm, Shoulder and Hand Score (DASH)  
163 at 6 wks, 3, 6 mo, 2, 5, 10 years
- 164 12. Pain at rest and in activity, Numerical Rating Scale (NRS) 0-10  
165 at 6 wks, 3, 6 mo, 12 mo, 2, 5, 10 years
- 166 13. Percentage of patients with acceptable symptom state (PASS)

## 168 1.3. Summary of Amendments

170 *Primary and secondary outcomes*

- 171
- 172 - Pain at rest and activities downgraded as secondary outcomes
- 173 - DASH at 12 months specified as the single primary outcome and other time points downgraded to secondary
- 174 outcomes

176 When we registered the trial in ClinicalTrials.gov, our primary outcome measures were the pain at rest and activities  
177 at 6 weeks, 3 months, 6 months and 12 months as well as change in DASH at 6 weeks, 3 months, 6 months and 12  
178 months. The secondary outcomes were as listed above in the original protocol. After discussing within the study group  
179 about the complexity of having several outcome measures at different time points we first decided to downgrade  
180 other time points than 12 months to secondary outcomes (the change was sent to clinicaltrials.gov on January 23,

181 2013) and later on we made a decision to have only one primary outcome, DASH at 12 months, since this instrument  
182 contains also questions regarding pain at rest and at activities. The change was made to clinicaltrials.gov on August 19,  
183 2016.

184  
185 - Percentage of patients with acceptable symptom state (PASS)

186  
187 We added this secondary outcome when preparing our protocol publication in the spring 2017 and it was added to  
188 clinicaltrials.gov on May 28, 2017. We felt it would add value to our list of secondary outcomes if we define PASS of  
189 DASH score in our study population and define which part of the study group has achieved this at different time  
190 points.

191  
192 *Enrollment*

193  
194 - Enrollment from 100 [anticipated] to 82 [actual]

195  
196 When we first registered the study, we reported the enrollment to be 100 patients. We had done the power analysis  
197 which showed 35 patients per group and we decided to have 12,5% lost to follow-up reservation. When we sent our  
198 study protocol to the ethical board of Helsinki and Uusimaa Hospital District, we put the correct value of 80 patients  
199 to the target field. We first registered the enrollment target to 100 patients and after noticing this mistake we made  
200 the correction to clinicaltrials.gov on May 28, 2017 when we unified the registered protocol between clinicaltrials.gov  
201 and the accepted protocol paper<sup>1</sup>. The number of enrolled patients became 82 since the enrollment took place in two  
202 separate units and we were unable to stop the recruiting exactly at 80 patients. After noticing we had achieved the  
203 target, we stopped the enrollment on January 2018.

204  
205 Be it noticed here that all the above noted amendments to the original protocol were made prior to completion of the  
206 trial and before doing any data analysis and prior revealing the allocations of the study groups.

207  
208  
209

## 210 **2. PROTOCOL**

211  
212 The final study/trial protocol was published in the BMJ Open (Rämö et al<sup>1</sup>)

213  
214

215 **3. STATISTICAL ANALYSIS PLAN – 1-YEAR RESULTS**

216

217 **3.1. Original Statistical Plan**

218

219 A description of our original statistical analysis plan was published<sup>1</sup> as follows:

220

221 The data will be analyzed using IBM SPSS Statistics V.23 or higher. The results will be reported following the  
222 Consolidated Standards of Reporting Trials statement.

223

224 The baseline characteristics of the participants will be summarized by group, reported as a mean (SD)  
or median (first quartile, third quartile) for continuous variables, and count (%) for categorical variables.

225

226 Primary statistical analyses will be performed using intention-to-treat basis. For the primary analysis, a  
mixed-effects model (MM) analysis will be performed using the data set without multiple imputation to compare the  
227 mean DASH scores. Treatment group and visits will be included as fixed factors and patient as a random factor. The  
228 model will include interactions between treatment and visit. Randomization stratification factors and baseline value  
229 will be included as covariates. The treatment effect will be quantified with an absolute difference between the groups  
230 in the DASH score with the associated 95% CI and p value at 12 months post-randomization.

231

232 The MM model will also be used to analyze secondary outcomes where applicable (pain-NRS at rest  
and during activities, 15D, CS). For categorical response variables, effects will be analyzed by logistic regression  
233 analysis with treatment as the fixed-factor covariate. These secondary outcomes will only be supportive, explanatory  
234 or hypothesis-generating (or both), which is why multiplicity is not considered to be a problem.

235

236 The adverse events of the study arms will be reported descriptively. If the number of events is large  
enough, an analysis between study arms will be performed.

237

238 All scale variables will be tested for normality with the Kolmogorov-Smirnov test. Variance of  
homogeneity will be tested using Levene's test. We consider a two-sided p value of 0.05 to indicate statistical  
239 significance.

240

241 We will perform secondary statistical analyses to identify potential effect-modifying and mediating  
factors. Potential effect-modifying factors to be tested with regression analyses are age, gender, body mass index,  
242 physical activity, smoking, level of education, fracture of dominant/non-dominant arm and position of the fracture.  
The absence of adverse effects and treatment attendance as intended will be analyzed as a potential effect-mediating  
243 factor.

244

245 We will also perform an on-treatment analysis if there are patients treated with a non-allocated  
246 method because patients declined the allocated treatment after the randomization, thus causing crossover in study  
247 arms. A medical reason to change treatment method, practically from conservative treatment to ORIF because of non-  
248 union or fracture threatening skin integrity in the early phase of treatment, will not be considered as a crossover.  
249 However, we will analyze such patients in a separate subgroup.

250

251 **3.2. Blinded Data Interpretation Protocol**

252

253 We used blinded data interpretation in analyzing the results of this trial.<sup>2</sup> The blinded data interpretation protocol was  
254 published in our protocol paper<sup>1</sup> as follows:

255

256 Before accessing the primary outcome data, the Writing Committee will record a 'Background assumptions'  
statement, which will contain our definition of MID of the outcome measures and a brief summary of the key  
257 statistical analysis used in the evaluation of the outcome data. The document will be signed by the members of the  
258 Writing Committee and published as an appendix to the primary publication. After this, the Writing Committee will  
259 write two interpretations of the trial results on the basis of a blinded review of the primary outcome data (treatment  
260 A compared with treatment B), with the assumption that A is the ORIF group and another assuming that A is the  
261 conservatively treated group. Decisions regarding the key analyses and presentation format for the primary  
262 publication before data analysis will also be decided in a meeting of the Writing Committee. The minutes of this  
263 meeting will be recorded as a statement of interpretation document, which will be signed by all members of the  
264 Writing Committee before the unsealing of the randomization.

265  
266  
267  
268  
269  
270  
271  
272  
273  
274  
275  
276  
277  
278  
279  
280  
281  
282  
283  
284  
285  
286  
287  
288  
289  
290  
291  
292  
293

### 3.3. Statistical Analysis Plan – Amendments

The statistician doing the data analysis is using Stata version 15.1 (StataCorp LLC, Texas, USA) instead of IBM SPSS Statistics. We consider this a minor technical detail which does not affect the interpretation of our results.

Instead of Kolmogorov-Smirnov test for normality and Levene’s test for homogeneity, we will use other techniques, e.g., graphical evaluation.

All P values larger than 0.01 are be reported to two decimal places, and those between 0.01 and 0.001 to three decimal places; P values smaller than 0.001 are be reported as  $P < 0.001$ . We made this amendment since we did not state this in our protocol paper.

#### Primary analysis – Amendments

The primary comparison on the effectiveness of the treatment will be performed as a between-group comparison using a mixed-model repeated-measures analysis of variance (MMRM ANOVA). In the original analysis plan we used a term ‘MM model’ but changed the term to ‘MMRM ANOVA’ as it is more widely used term. We consider this only a terminological issue not affecting the analysis.

Study group and time of assessment (baseline, 6 weeks, 3, 6 and 12 months) were included as fixed factors, patient as a random factor. The model included interactions between study group and time of assessment. Change from baseline was estimated with baseline value as covariate. An unstructured covariance structure will be assumed. If the model cannot be fitted, compound symmetry will be assumed instead. The number of degrees of freedom will be assessed using Satterthwaite’s method. The MMRM model will be used to quantify the treatment effect as the absolute difference between the groups in DASH score with the associated 95% confidence interval (CI) and p-value at 12 months post-randomization.

The main publication with primary time point results was published in the JAMA 2020.

294 **4. STATISTICAL ANALYSIS PLAN – 2-YEAR RESULTS**

295

296

**4.1. Background**

297

298

299

300

301

302

303

304

305

306

307

The primary comparison showed no statistically significant between-group difference in the primary outcome, DASH, at 12 months after randomization. However, an important finding in the preplanned per protocol analysis of the 1-year results showed that the crossover group (patients allocated to bracing but who underwent secondary surgery to promote the healing of the fracture) had a statistically and clinically significant between-group difference in the primary outcome and most of the secondary outcomes compared to the surgery and the bracing group without crossovers. The recovery of these crossover patients after 12 months remained an important study question for the 2-year follow-up. Therefore, we planned the 2-year follow-up analyses to explore whether the crossover group reaches the outcome scores of the early surgery and the bracing group healing without subsequent intervention after the primary time point of 12 months.

308

**4.2. Statistical methods**

309

310

Our statistical analysis plan at 2-year follow-up will be as follows:

311

312

313

314

315

316

317

318

The primary analysis method for this exploratory study will be per protocol analysis with three groups: initial surgery group, successful bracing group with no surgery during 2-year follow-up, and a secondary surgery group who had late surgery to promote the healing of the fracture during 2 years after randomization. In addition, we will carry out intention-to-treat analysis where the patients are analyzed according their randomization groups and an as-treated analysis where the patients are analyzed per latest treatment modality (surgery/nonoperative) at the different follow-up time points. The number of patients in surgery group increased in subsequent follow-up points as patients allocated to functional bracing were operated during the 2 years.

319

320

321

322

323

324

325

326

327

The comparison between the study groups will be performed using a mixed-model repeated-measures analysis of variance. Study group, study site, and time of assessment (baseline, 6 weeks, 3, 6 and 12 months, and 2 years) will be included as fixed factors, patients as random factors. The model includes interactions between study group and time of assessment. Change from baseline will be estimated with baseline value as covariate. The model will be used to quantify the treatment effect as the absolute difference between the groups in the primary outcome (DASH score, mean and 95% confidence interval [CI], and p-value) at 2 years after randomization. A similar model will be used to analyze secondary outcomes where applicable (pain-NRS at rest and during activities, 15D, Constant-Murley Score). For categorical response variables, effects will be analyzed using marginal logistic regression analysis.

328

329

330

331

332

333

334

Be it reiterated here that the primary comparison for 2-year follow-up (per protocol) will be different from the method of primary comparison at the primary time point of 12 months (intention-to-treat). The rationale behind this is that with this analysis we are primarily exploring whether the patients who underwent late surgery will reach the results of the patients with successful healing of the fracture with initially allocated treatment at 2 years. Because of the potential for type 1 error due to multiple comparisons, all findings for analyses of the 2-year follow-up should be interpreted as exploratory. The statistical model in the analyses allows missing data. No data will be thus imputed. Patients with at least some data can be included in the analyses.

335

336

337

338

An independent statistician will do all the analyses according to the preplanned statistical analysis plan. The threshold for statistical significance will be set at level 0.05 with 2-sided testing. The data will be analyzed using Stata version 15.1 with the “mixed” procedure (StataCorp LLC, Texas, USA).

339

**4.3. Implementation of Analysis Plan**

340

341

342

343

344

This SAP will be used as a work description for the statistician performing the analyses. All analyses will be performed by the same statistician and none of the clinical investigators involved in this trial will perform any of the statistical analyses.

345

346

347

348

Results will be presented to the trial Writing Committee; any uncertainties will be clarified from the statistician. Blinded data interpretation is not used at 2 years as the number of patients in each of the study groups were revealed to the Writing Committee at 1-year.



349 Be it reiterated here that the statistical analysis plan for 2-year results was decided before having any results from the  
350 statistician.  
351

Helsinki, May 4, 2020

  
\_\_\_\_\_  
Lasse Rämö

  
\_\_\_\_\_  
Mika Paavola

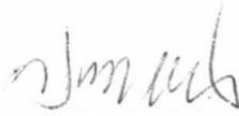  
\_\_\_\_\_  
Bakir O. Sumrein

  
\_\_\_\_\_  
Vesa Lepola

  
\_\_\_\_\_  
Tuomas Lähdeoja

  
\_\_\_\_\_  
Teppo Järvinen

  
\_\_\_\_\_  
Simo Taimela

352  
353  
354  
355  
356

357 **5. STATISTICAL ANALYSIS PLAN – 5-YEAR RESULTS**

358

359

**5.1. Background**

360

361

362

363

364

365

366

367

368

369

370

**5.2. Statistical methods**

371

372

373

374

375

376

377

378

379

380

381

382

383

384

385

386

387

388

389

390

391

392

393

394

395

396

397

398

399

400

The primary comparison showed no statistically significant between-group difference in the primary outcome, DASH, at 12 months after randomization. However, an important finding in the preplanned per protocol analysis of the 1-year results showed that the crossover group (patients allocated to bracing but who underwent secondary surgery to promote the healing of the fracture) had a statistically and clinically significant between-group difference in the primary outcome and most of the secondary outcomes compared to the surgery and the bracing group without crossovers. The recovery of these crossover patients after 12 months remained an important study question for the 2-year follow-up. We found that the results of these patients with secondary surgery remained inferior at two years compared to those with initial surgery and those with successful bracing. Therefore, we planned that at 5-year follow-up we will perform a similar per protocol analysis in addition to primary intention-to-treat analysis.

Our statistical analysis plan at 5-year follow-up will be as follows:

The primary analysis method for this study will be intention-to-treat analysis: surgery group and bracing group. In addition, we will carry out a per protocol analysis with three groups: initial surgery group, successful bracing group with no surgery during 5-year follow-up, and a secondary surgery group who had late surgery to promote the healing of the fracture during 5 years after randomization.

The comparison between the study groups will be performed using a mixed-model repeated-measures analysis of variance. Study group, study site, and time of assessment (baseline, 6 weeks, 3, 6 and 12 months, 2 and 5 years) will be included as fixed factors, patients as random factors. The model includes interactions between study group and time of assessment. Change from baseline will be estimated with baseline value as covariate. The model will be used to quantify the treatment effect as the absolute difference between the groups in the primary outcome (DASH score, mean and 95% confidence interval [CI], and p-value) at 5 years after randomization. A similar model will be used to analyze secondary outcomes where applicable (pain-NRS at rest and during activities, 15D, Constant-Murley Score). For categorical response variables, effects will be analyzed using Fisher exact test.

The statistical model in the analyses allows missing data. No data will be thus imputed. Patients with at least some data can be included in the analyses.

An independent statistician will do all the analyses according to the preplanned statistical analysis plan. The threshold for statistical significance will be set at level 0.05 with 2-sided testing. The data will be analyzed using Stata version 15.1 with the “mixed” procedure (StataCorp LLC, Texas, USA).

**5.3. Implementation of Analysis Plan**

This SAP will be used as a work description for the statistician performing the analyses. All analyses will be performed by the same statistician and none of the clinical investigators involved in this trial will perform any of the statistical analyses.

401 **References**

402

403 1. Rämö L, Taimela S, Lepola V, Malmivaara A, Lähdeoja T, Paavola M. Open reduction and internal fixation of  
404 humeral shaft fractures versus conservative treatment with a functional brace: a study protocol of a randomised  
405 controlled trial embedded in a cohort. *BMJ Open*. 2017;7(7):e014076. doi:10.1136/bmjopen-2016-014076.

406 2. Järvinen TLN, Sihvonen R, Bhandari M, et al. Blinded interpretation of study results can feasibly and effectively  
407 diminish interpretation bias. *Journal of Clinical Epidemiology*. 2014;67(7):769-772.  
408 doi:10.1016/j.jclinepi.2013.11.011.

409
