# Supplementary material
Source: PubMed Central journal article supplement (PMC10912996)
Supplement: jama-e242671-s002.pdf [file jama-e242671-s002.pdf]

## Data Sharing Statement

Rämö. Five-Year Follow-Up of Surgery vs Functional Bracing for Closed Displaced Humeral Shaft Fractures. *JAMA*. Published March 04, 2024. doi:10.1001/jama.2024.2671

### Data

**Data available:** Yes

**Data types:** Deidentified participant data

**How to access data:** [lasse.ramo@hus.fi](mailto:lasse.ramo@hus.fi)

**When available:** With publication

### Supporting Documents

**Document types:** None

### Additional Information

**Who can access the data:** researchers whose proposed use of the data has been approved

**Types of analyses:** individual patient-level data meta-analyses

**Mechanisms of data availability:** with investigator support after approval of a proposal
